# Supplementary material for: Oral administration of EGCG solution equivalent to daily achievable dosages of regular tea drinkers effectively suppresses miR483-3p induced metastasis of hepatocellular carcinoma cells in mice
Source: Royal Society of Chemistry journal article supplement (doi:10.1039/d1fo00664a), 2021-01-01
Supplement: d1fo00664a1.pdf [file d1fo00664a1.pdf]

## Supplementary Fig. 1

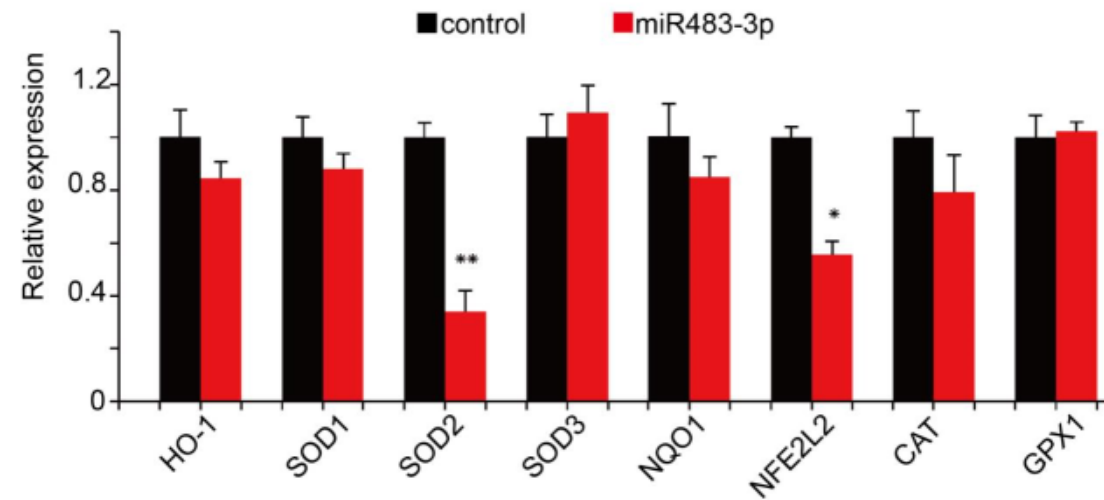

**Supplementary Fig. 1.** Identification of antioxidant genes targeted by miR483-3p.

## Supplementary Fig. 2

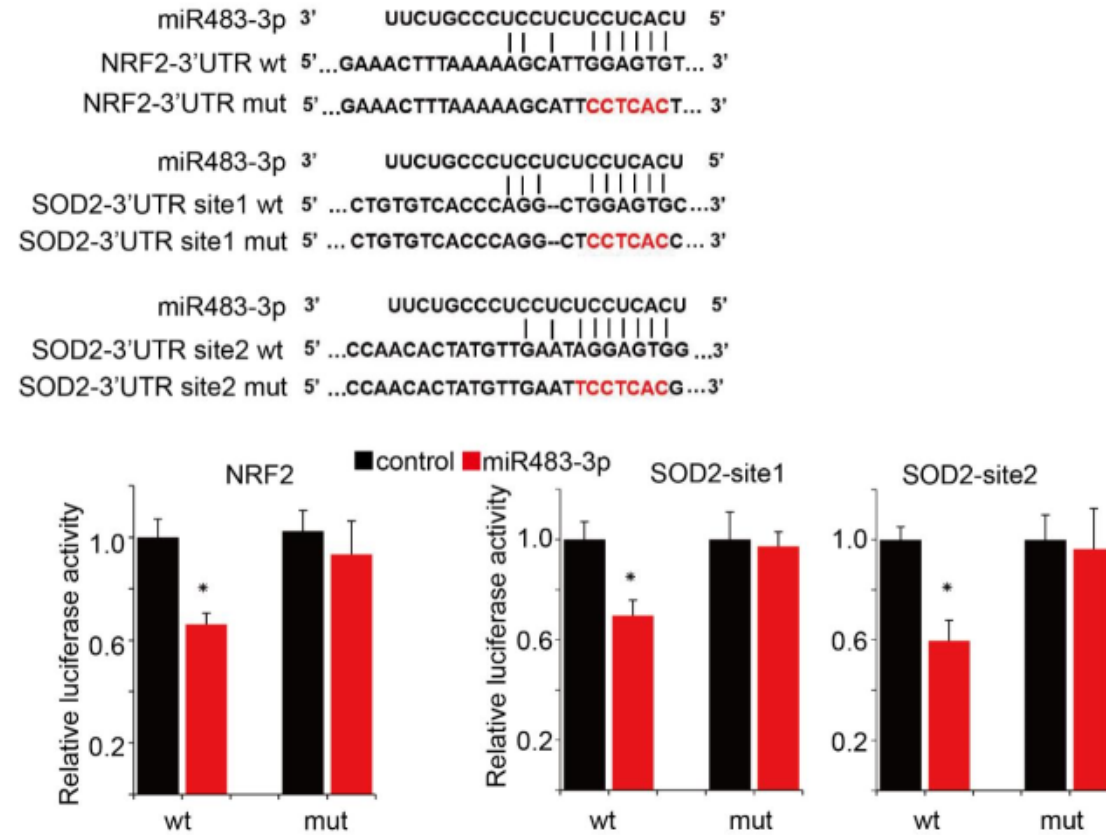

Supplementary Fig. 2. Luciferase activity assay of antioxidant genes targeted by miR483-3p.

### Supplementary Fig. 3

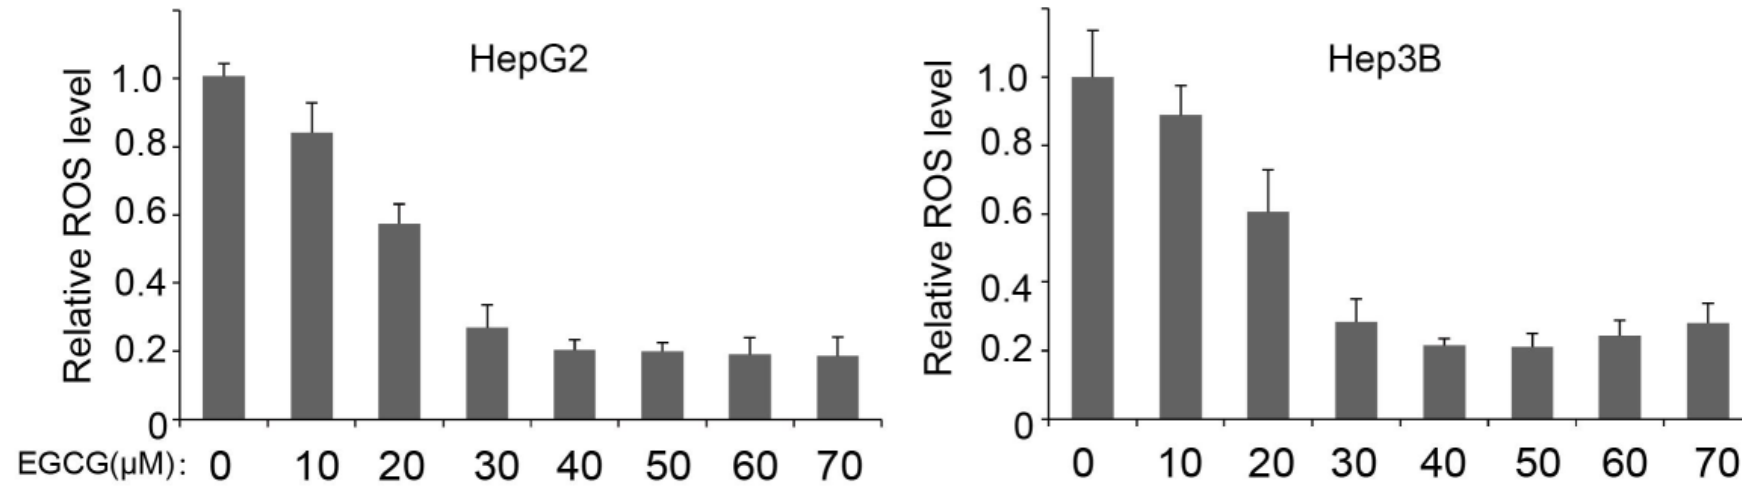

**Supplementary Fig. 3.** Effect of EGCG on ROS levels in miR483-3p-overexpressed HCC cells.

## Supplementary Fig. 4

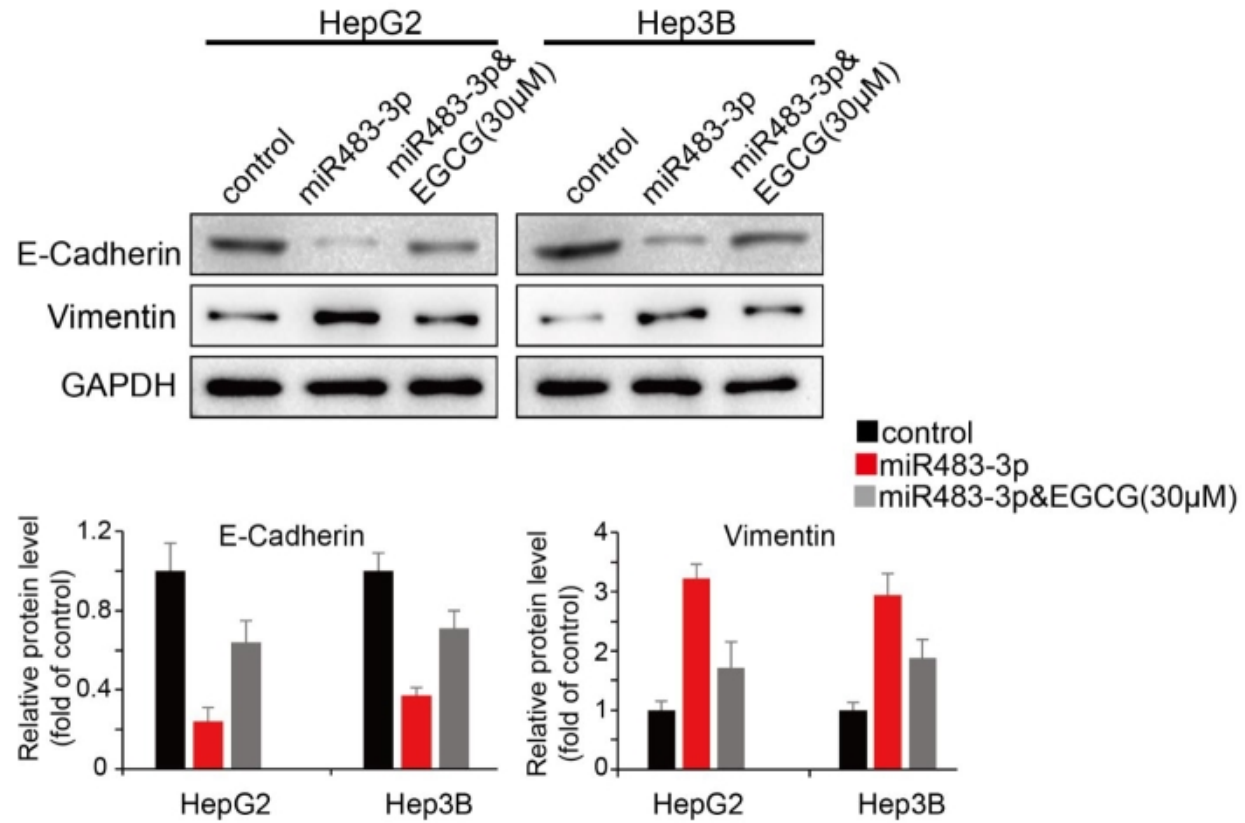

**Supplementary Fig. 4.** Levels of EMT markers (E-cadherin and vimentin) in HCC cells subjected to different treatments.

**Supplementary Fig. 5**

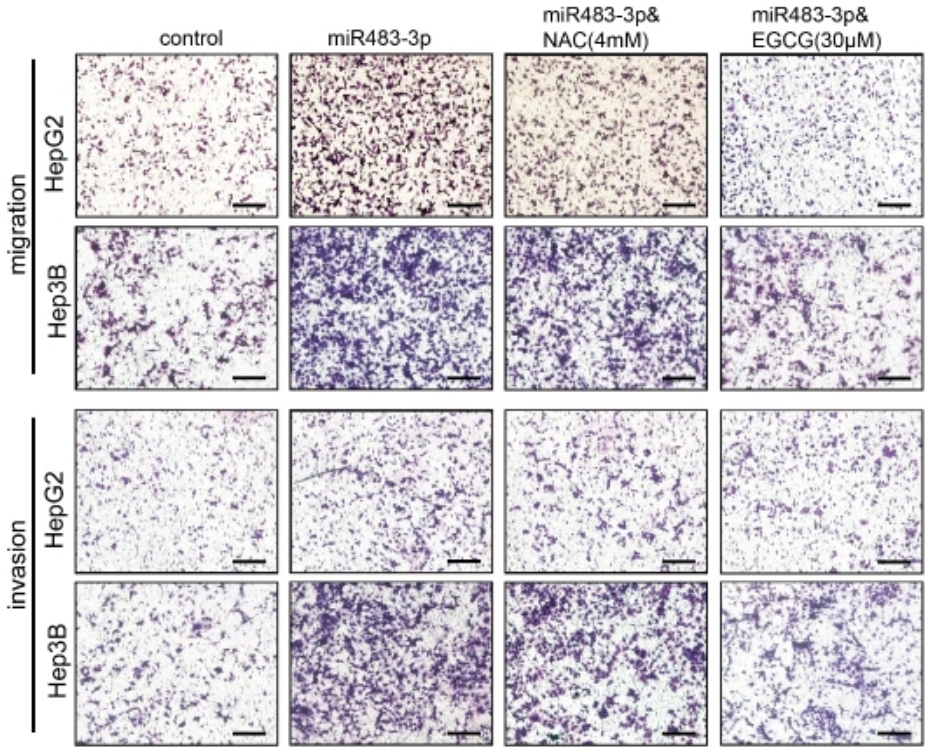

**Supplementary Fig. 5.** Migration and invasion assays of HCC cells subjected to different treatments. scale bar = 100µm.

## Supplementary Fig. 6

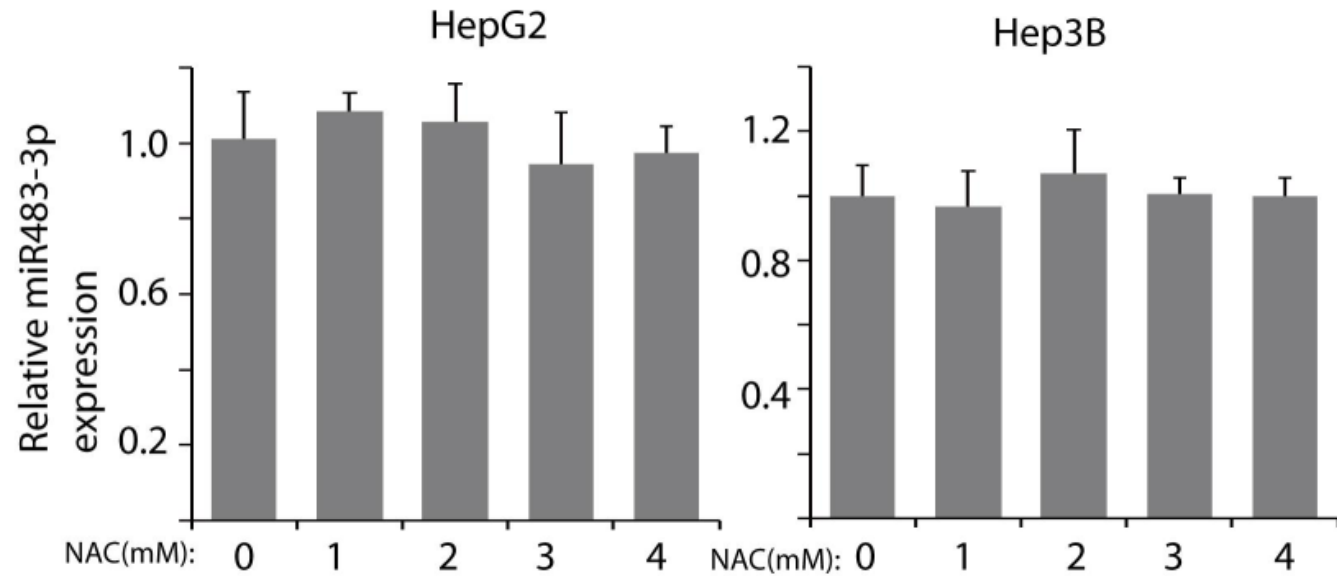

**Supplementary Fig. 6.** Effect of different concentrations of NAC on the expression of miR483-3p in HCC cells.

## Supplementary Fig. 7

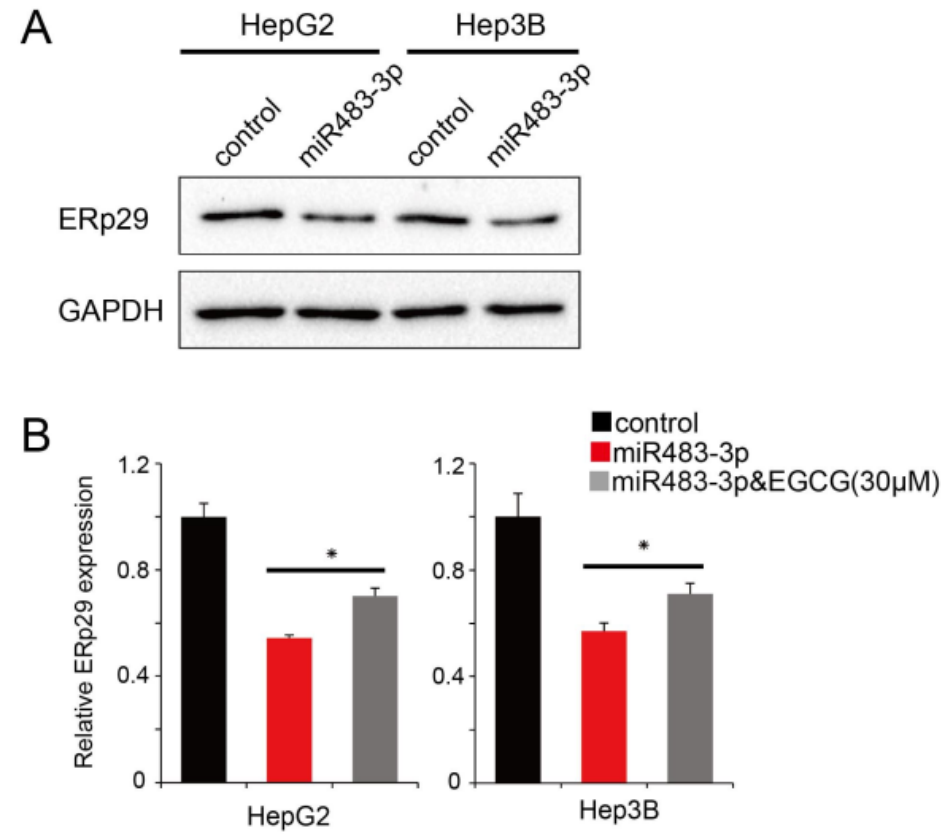

**Supplementary Fig. 7.** Non-cytotoxic dose of EGCG partly restores the miR483-3p induced downregulation of ERp29 in HCC cells.

## qPCR primers

| Forward                        | Reverse                 |
|--------------------------------|-------------------------|
| SOD2: GGAAGCCATCAAACGTGACTT    | CCCGTTCCTTATTGAAACCAAGC |
| NRF2: TCAGCGACGGAAAGAGTATGA    | CCACTGGTTTCTGACTGGATGT  |
| SOD1: GGTGGGCCAAAGGATGAAGAG    | CCACAAGCCAAACGACTTCC    |
| SOD3: ATGCTGGCGCTACTGTGTTT     | CTCCGCCGAGTCAGAGTTG     |
| HO-1: AAGACTGCGTTCCTGCTCAAC    | AAAGCCCTACAGCAACTGTCG   |
| GAPDH: AATCCCATCACCATCTTCCA    | TGGACTCCACGACGACTCA     |
| CAT : TGGAGCTGGTAACCCAGTAGG    | CCTTTGCCTTGGAGTATTTGGTA |
| GPX1: CAGTCGGTGTATGCCTTCTCG    | GAGGGACGCCACATTCTCG     |
| NQO1: GAAGAGCACTGATCGTACTGGC   | GGATACTGAAAGTTCGCAGGG   |
| miR483-3p: GCGAGCACTCACTCCTCTC | TGGTGTCGTGGAGTCGGC      |

Stem loop primers for miR483-3p reverse transcription:

GCGTCTCAACTGGTGTCGTGGAGTCGGCAATTCAGTTGAGACGCAAGACGGGA

sgRNA targeting miR483-3p promoter

sgRNA-1:TCCAGCTGAGCATTGCTGTG

sgRNA-2:CTTGGGGGACCCCCGTGATG

Primers for BSP

forward: TTTTTTGAGAGGAGGGGAGGG      reverse: CACCACCCCTAAAACACTAAAACA
